# Supplementary material for: Timing variability and midfrontal ~4 Hz rhythms correlate with cognition in Parkinson’s disease
Source: PubMed Central journal article supplement (PMC7884691; doi:10.1038/s41531-021-00158-x), 2021-02-15
Supplement: 41531_2021_158_MOESM1_ESM.pdf [file 41531_2021_158_MOESM1_ESM.pdf]

1 **Interval timing variability and midfrontal ~4 Hz rhythms correlate with cognitive**  
2 **dysfunction in Parkinson's disease**

3

4 Arun Singh<sup>1</sup>, Rachel C. Cole<sup>2</sup>, Arturo I. Espinoza<sup>2</sup>, Aron Evans<sup>3</sup>, Scarlett Cao<sup>4</sup>, James  
5 F. Cavanagh<sup>5</sup> and Nandakumar S. Narayanan<sup>2\*</sup>

6

Supplementary Figures

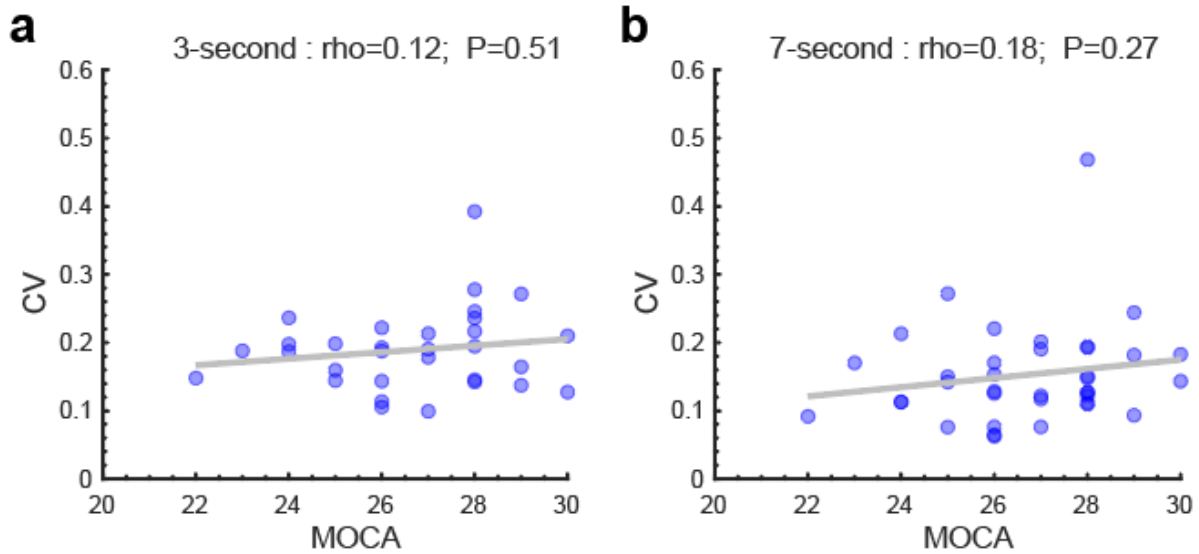

10

11

12 **Supplementary Figure 1. Timing variability does not correlate with cognitive**  
13 **dysfunction in controls.** Timing variability as measured by keypress CV correlated  
14 with cognitive function as measured by MOCA for a) 3-second and b) 7-second intervals  
15 in control participants only.

16

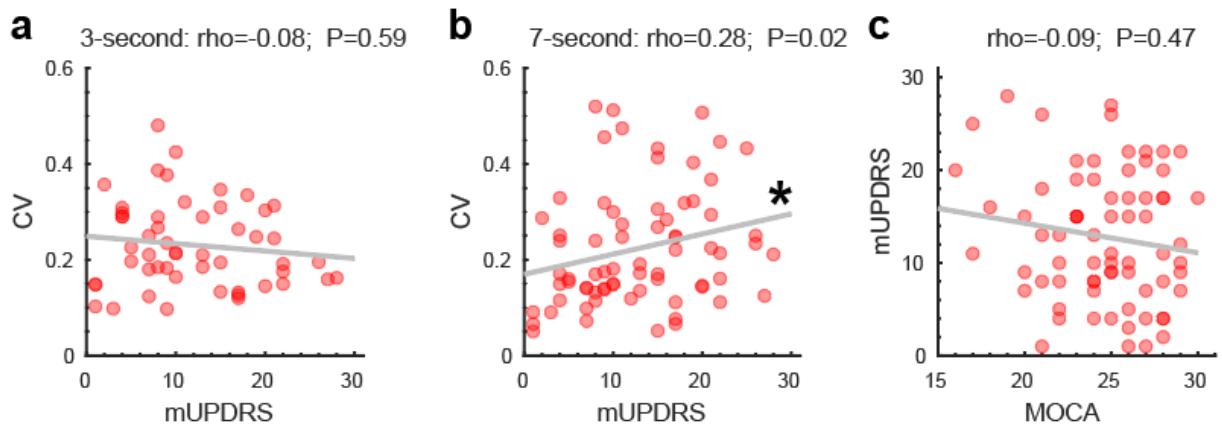

18

19 **Supplementary Figure 2. Motor function by mUPDRS correlated with CV and**

20 **MOCA in PD.** Keypress CV correlated with motor function as measured by the

21 mUPDRS for a) 3-second and b) 7-second intervals (\*= $p < 0.05$ ). c) mUPDRS was not

22 correlated with cognitive function as measured by MOCA.

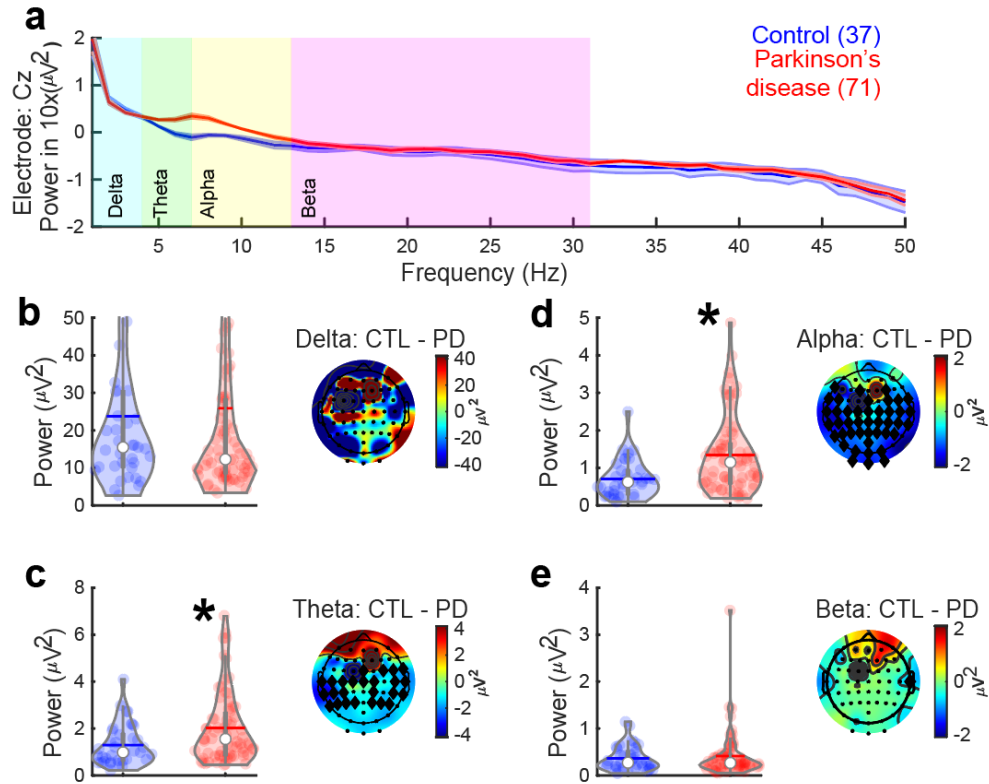

23

24 **Supplementary Figure 3. Baseline midfrontal theta and alpha power is increased**

25 **in PD.** We also performed conventional spectral analysis on pre-stimulation data  
 26 following Welch's power spectral density estimation method, using the pwelch function  
 27 in MATLAB. We selected a 1-second time window prior to the imperative "Go" cue on 7-  
 28 second trials. The number of overlapped samples was set to 50% of the window length  
 29 and the non-equispaced fast Fourier transform (NFFT) was assigned as the length of  
 30 the segments. a) Resting-state power spectral density of EEG power at midfrontal  
 31 electrode Cz revealed marked increases in theta (4-7 Hz) and alpha (7-13 Hz) power for  
 32 control (blue) and PD patients (red). Resting-state epoch was 1 second prior to the  
 33 instructional text from 7-second interval trials. Power for control and PD patients for b)  
 34 delta bands (1-4 Hz); c) theta bands (4-7 Hz; \* =  $t_{(106)}=-2.70$ ,  $p=0.008$ ); d) alpha bands  
 35 (7-13 Hz; \* = alpha:  $t_{(106)}=-3.56$ ,  $p=0.001$ ); and e) beta bands (13-30 Hz).

36

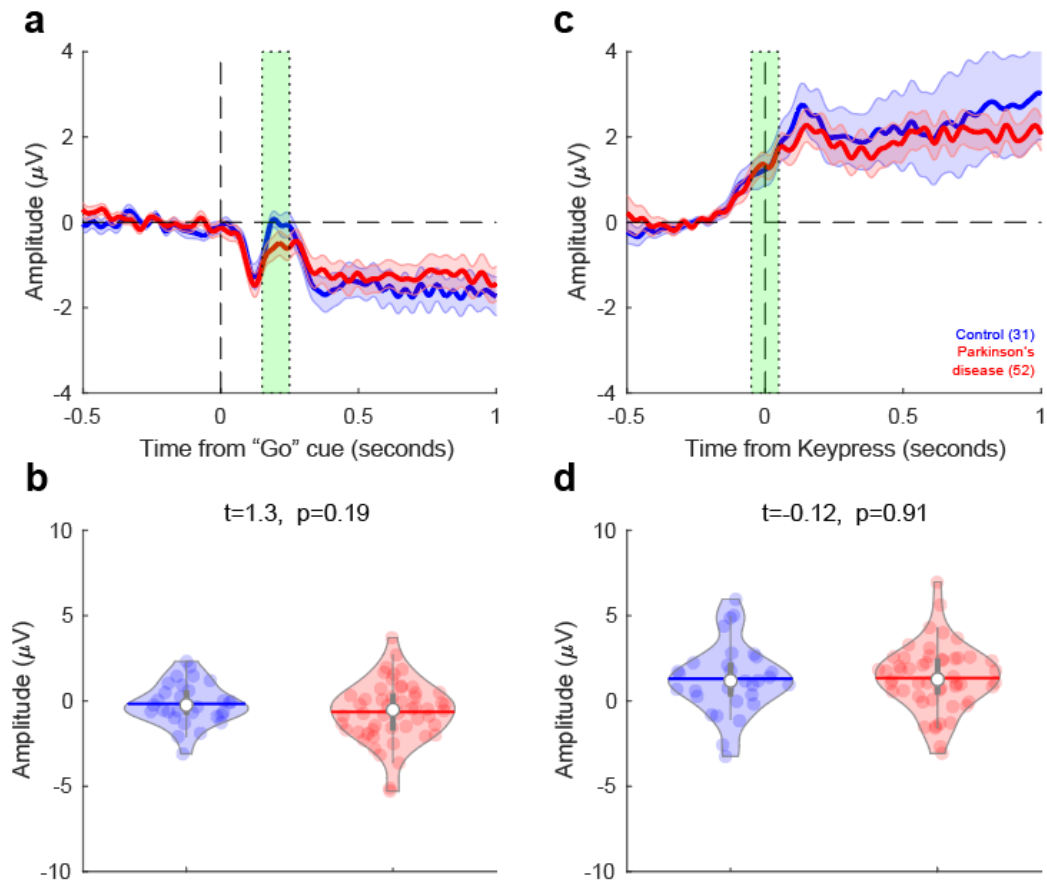

37

38 **Supplementary Figure 4. Event-related potentials (ERP) from electrode Cz for 3-**  
 39 **second trials.** No reliable difference in midfrontal cue-triggered (a and b) and  
 40 response-triggered (c and d) ERPs during 3-second interval timing task was observed  
 41 between PD patients and control subjects (ROIs: green box).

42

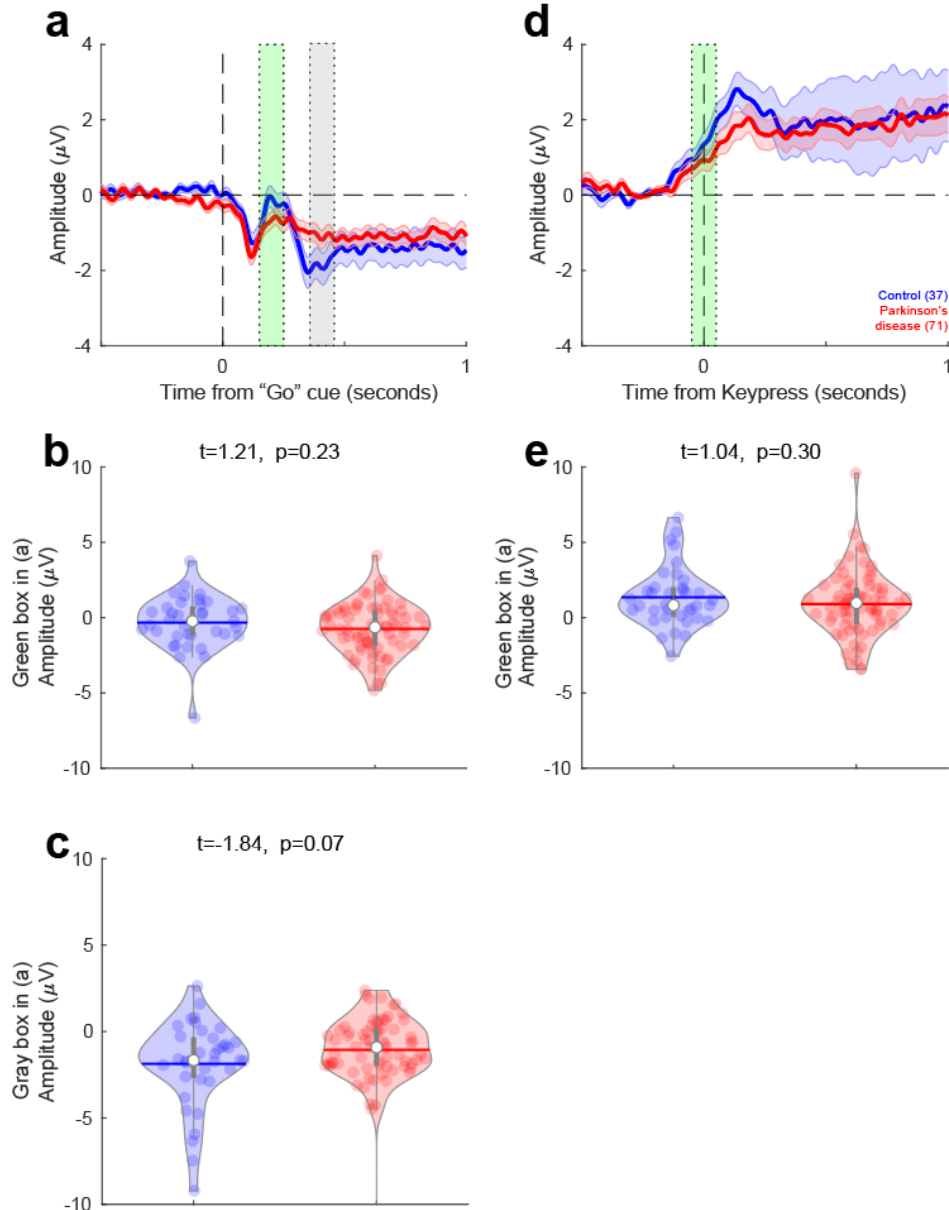

43

44 **Supplementary Figure 5. Event-related potentials (ERP) from electrode Cz for 7-**

45 **second trials.** No reliable differences in midfrontal cue-triggered (a, b, c, and d-e) and

46 keypress-triggered ERPs during 7-second interval timing task was observed between

47 PD patients and control subjects (ROIs: green/gray box for cue-triggered analysis,

48 green-box for keypress-triggered analysis).

49

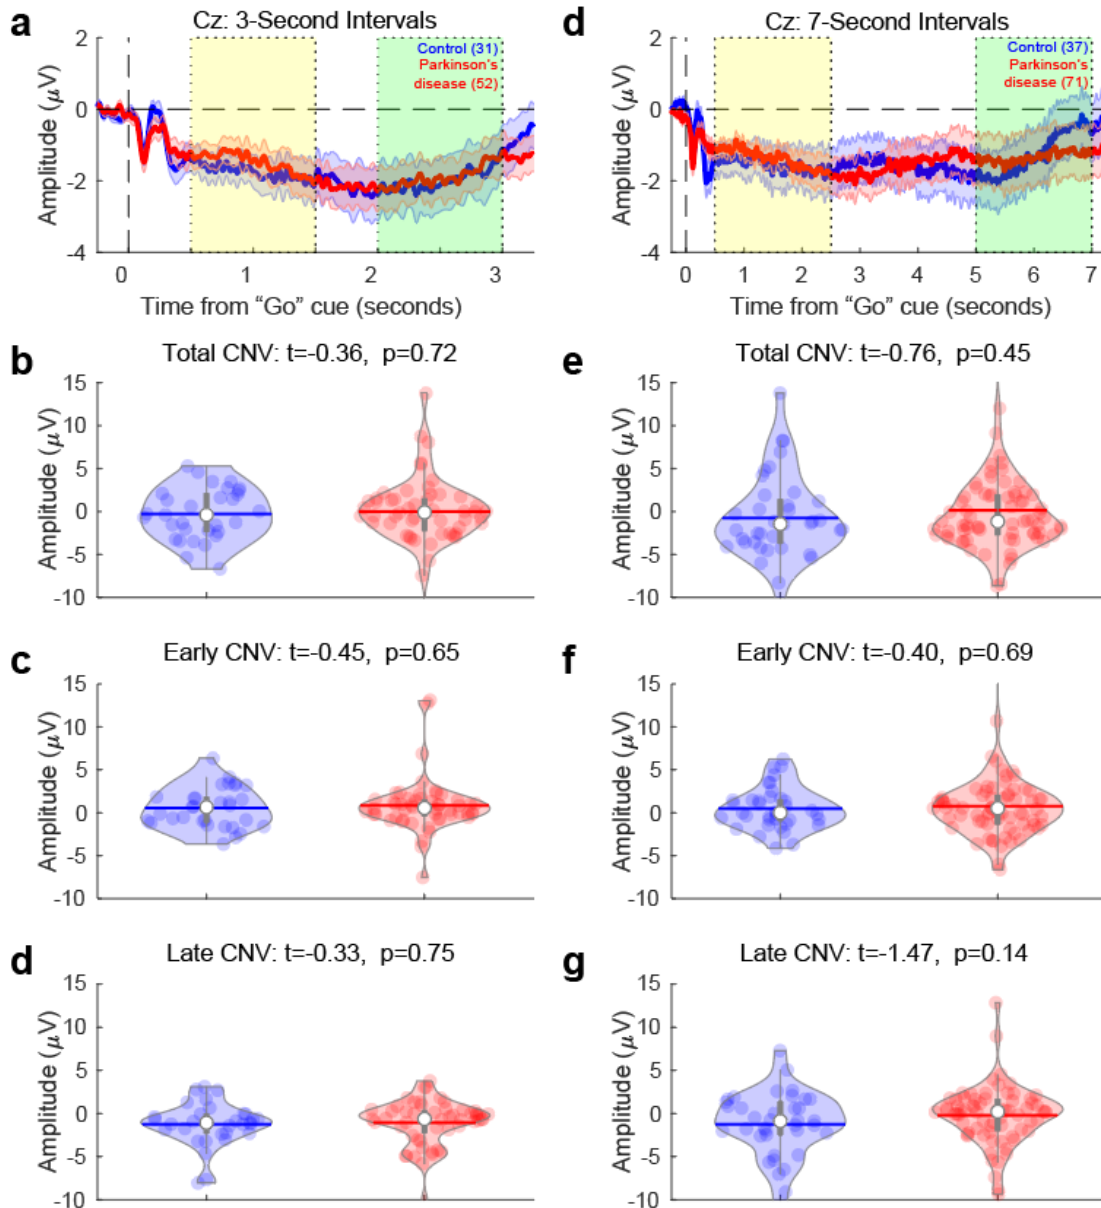

50

51 **Supplementary Figure 6. Contingent-negative variation (CNV) analyses for early**

52 **and late epochs.** For 3-second intervals, a) we found no reliable differences in

53 midfrontal CNV activity between control and PD participants for the mean amplitude of

54 b) total CNV (0.5 - 3 seconds), c) early CNV (0.5 – 1.5 seconds), or d) late CNVs (2-3

55 seconds). We also observed no reliable differences for 7-second intervals for e) total

56 CNV (0.5-7 seconds), f) early CNV (0.5-2.5 seconds), or g) late CNVs (5-7 seconds).

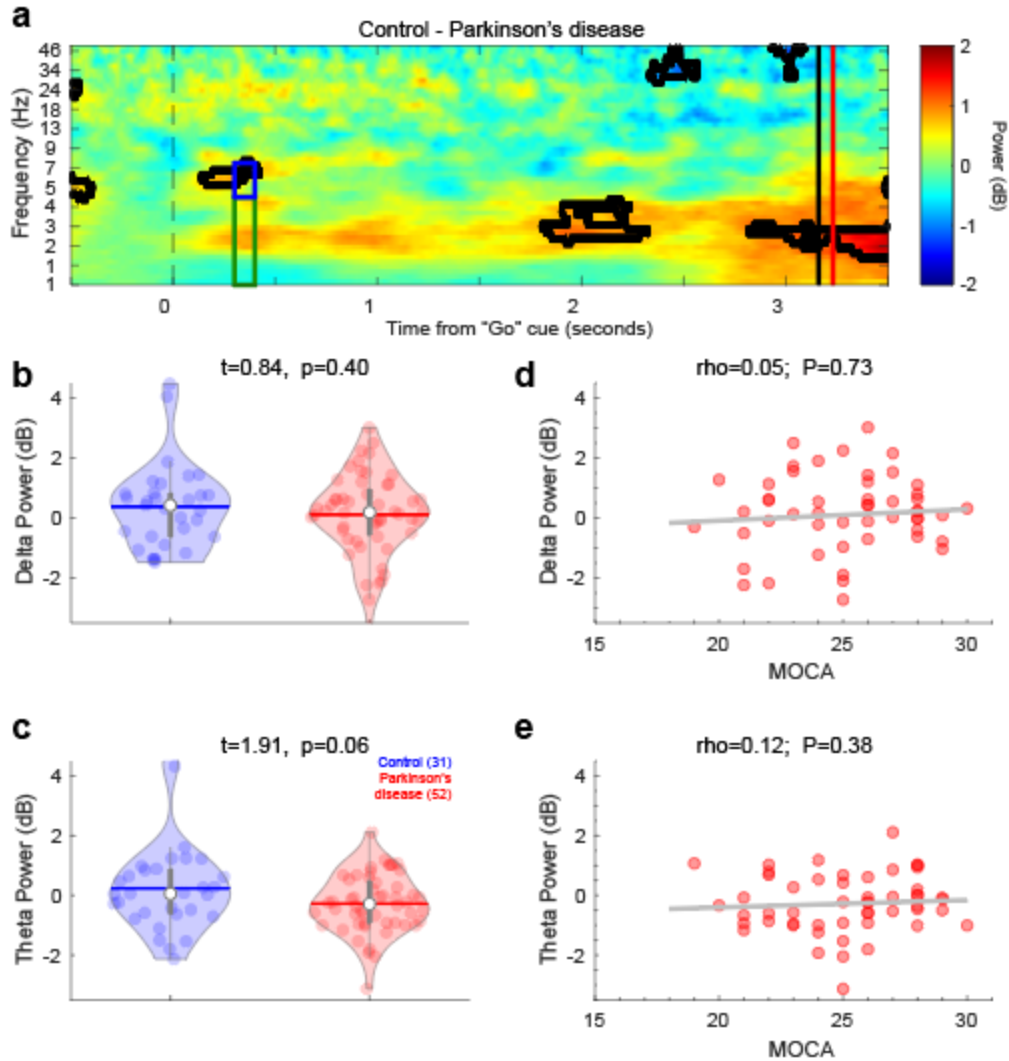

57

58 **Supplementary Figure 7. Midfrontal delta/theta activity for 3-second intervals. a)**

59 We compared time-frequency power of midfrontal activity after the imperative "Go" cue

60 for 3-second trials. Solid black lines indicate  $p < 0.05$  via a t-test of activity in control

61 compared to PD patients. b) cue-triggered midfrontal delta power (1-4 Hz, tf-ROI: green

62 box in a) and c) cue-triggered midfrontal theta power (4-7 Hz, tf-ROI: blue box in a) in

63 PD patients. d) delta and e) theta power vs. cognitive dysfunction as measured by

64 MOCA in PD patients. Data from PD ( $n=52$ ) and control ( $n=31$ ) patients on 3-second

65 trials.



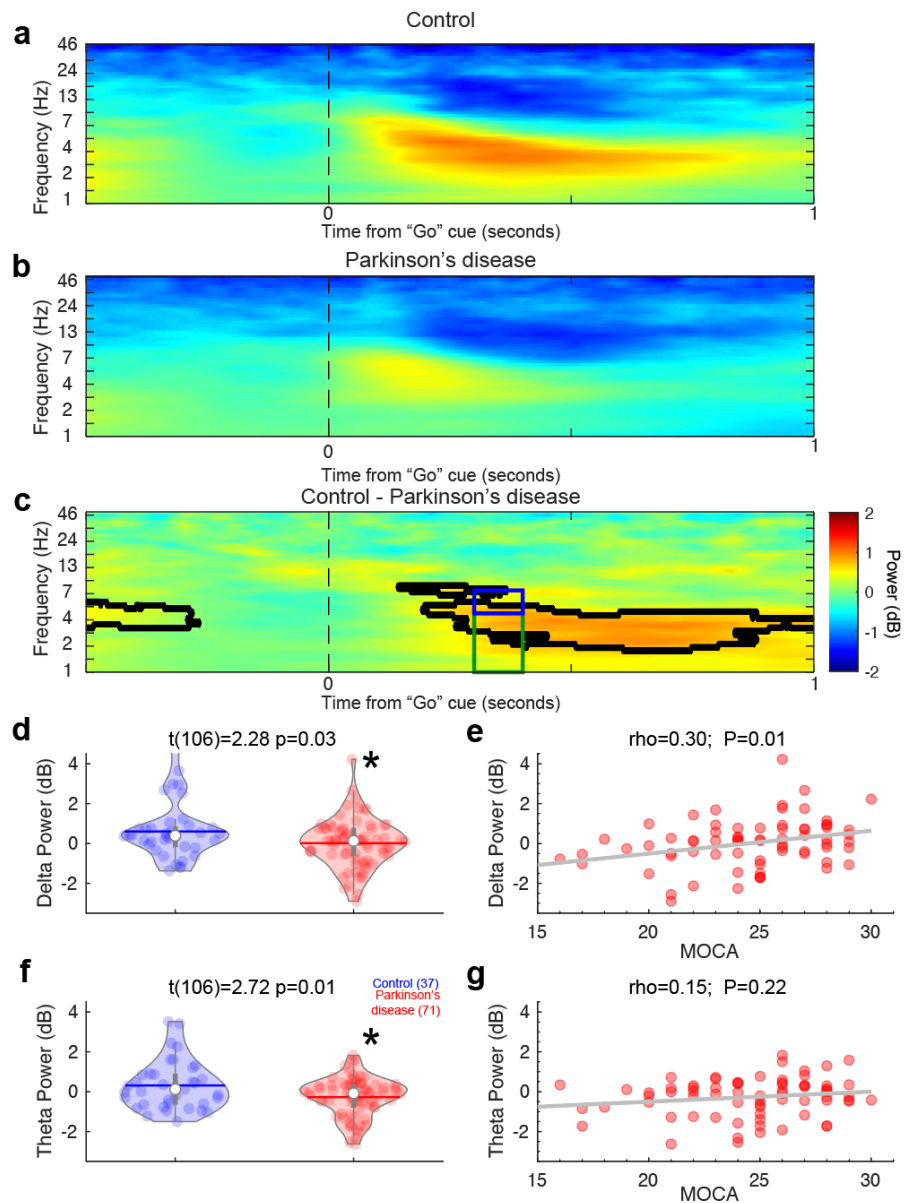

67

68 **Supplementary Figure 8. Cue-triggered delta power from a cluster of midfrontal**  
 69 **electrodes (FCz, Cz, and CPz) predicts cognitive dysfunction in PD. Whereas data**  
 70 **in Figure 2 included electrode Cz according to our *a priori* hypothesis, data in this figure**  
 71 **includes an expanded midfrontal coverage including FCz, Cz, CPz. Frequency power of**  
 72 **midfrontal activity over time from the imperative "Go" cue from a) control and b) PD**

73 participants on 7-second trials. c) Comparison of control and PD patients. Areas  
74 outlined by solid black lines indicate  $p < 0.05$  via a t-test of activity in control compared to  
75 PD participants. There was significantly less d) cue-triggered midfrontal delta power (1-  
76 4 Hz, time-frequency-Region-of-interest (tf-ROI): green box) and f) cue-triggered  
77 midfrontal theta power (4-7 Hz, tf-ROI: blue box) in controls vs. PD patients. e) Delta  
78 power predicted cognitive dysfunction as measured by MOCA in PD patients, but g)  
79 theta power did not.  $* = p < 0.05$ . Data from control (n=37) and PD (n=71) patients.  
80

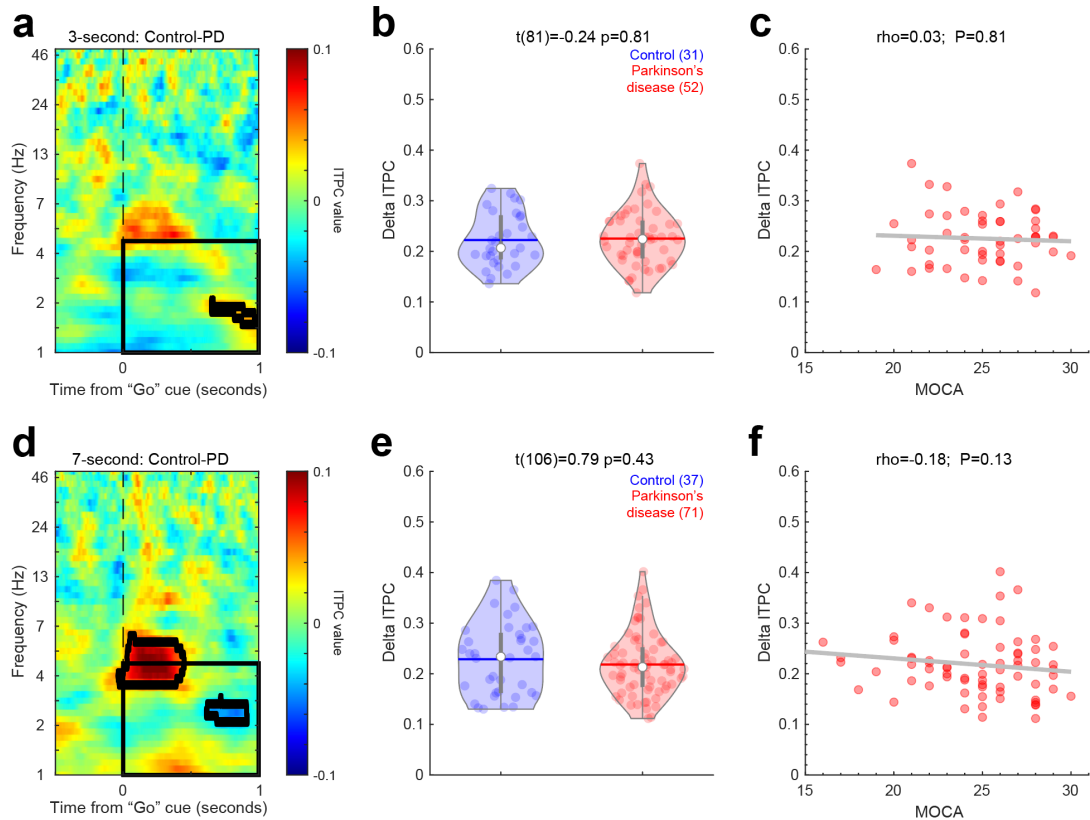

81

82 **Supplementary Figure 9. Intertrial phase coherence (ITPC).** a) For 3-second trials,  
 83 there were, b) few overall consistent differences between Control and PD patients for  
 84 delta bands 0-1 seconds after the cue, and c) no relationship with MOCA. Data from  $24$   
 85  $\pm 1.4$  (mean  $\pm$  SEM) trials. d) For 7-second trials, there were marked differences in  $\sim 4$   
 86 Hz ITPC around the "Go" cue, but e) no overall differences in delta bands 0-1 seconds  
 87 after the cue, and f) no relationship with MOCA. Data from  $33 \pm 0.8$  trials.

88

89

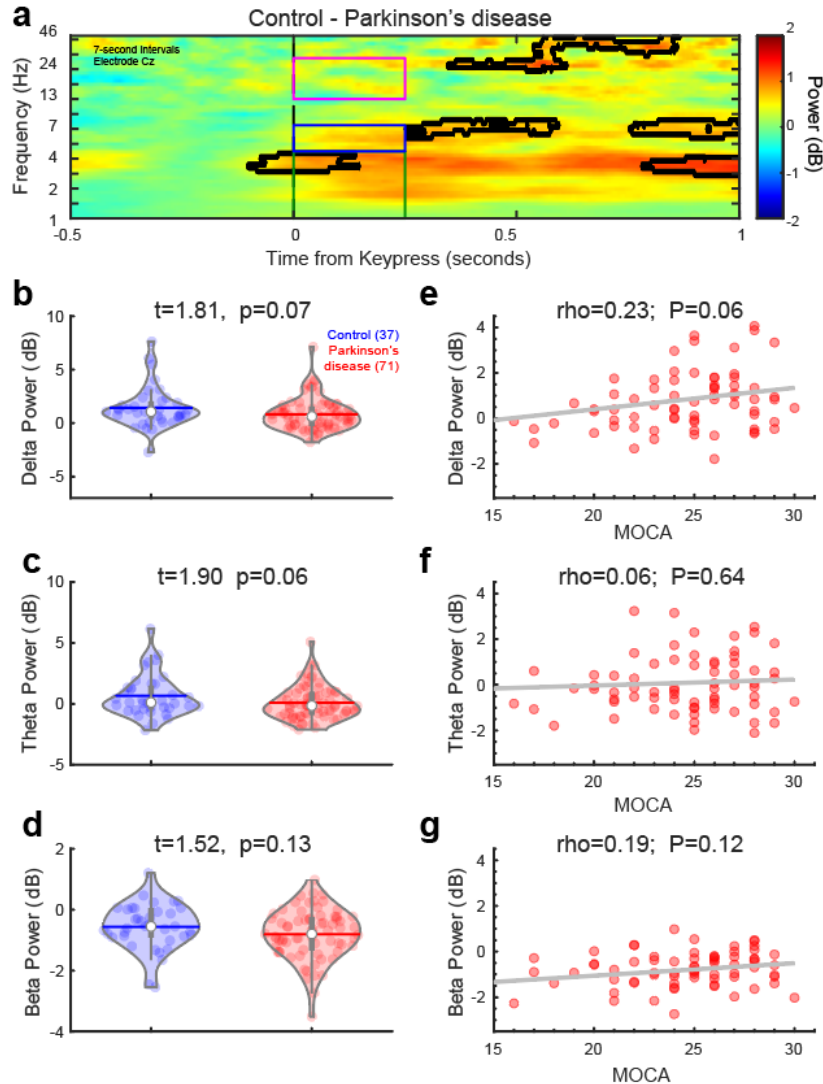

90

91 **Supplementary Figure 10. Midfrontal activity around keypress.** a) We compared  
 92 time-frequency power of midfrontal activity around response (“keypress”; time=0). Areas  
 93 outlined by solid black lines indicate  $p < 0.05$  via a t-test of activity in control compared to  
 94 PD participants. b) delta power (1-4 Hz, tf-ROI: green box in a), c) theta power (4-7 Hz,  
 95 tf-ROI: blue box in a) in PD patients, and d) beta power (13-30 Hz, tf-ROI: magenta box  
 96 in a) in control vs. PD patients. e) delta, f) theta, and g) beta power do not significantly  
 97 correlate with cognitive dysfunction as measured by MOCA in PD patients. Data from  
 98 71 PD and 37 control patients on 7-second trials.

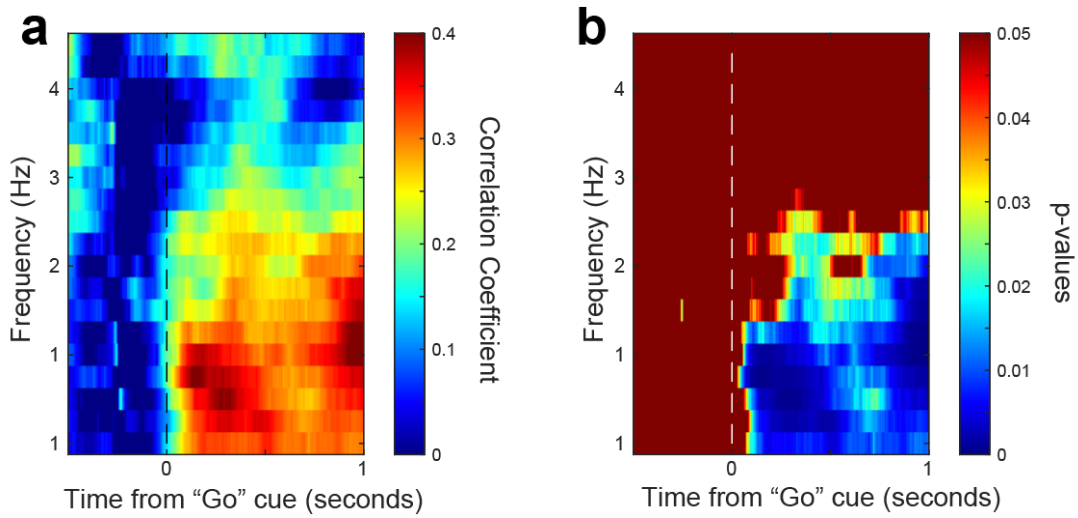

100

101 **Supplementary Figure 11. Correlations of cue-triggered delta power with MOCA.**

102 a). Correlation coefficient, and b) p-values for each point on time-frequency

103 spectrogram from EEG electrode Cz. Data from 71 PD patients in Figure 2.

104

105

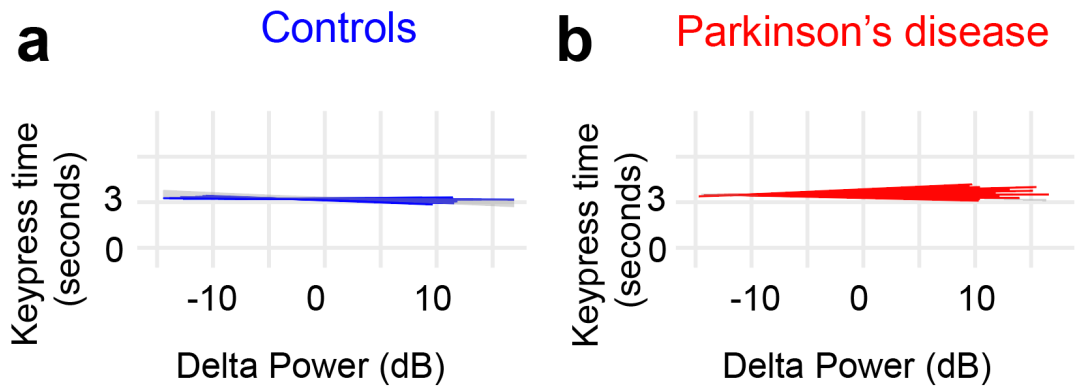

106

107

108 **Supplementary Figure 12. Delta activity does not predict temporal variability for 3-**

109 **second intervals.** a-b) No clear relationship with delta power and time estimates was

110 observed in controls or PD patients during 3-second interval timing task.

111

112

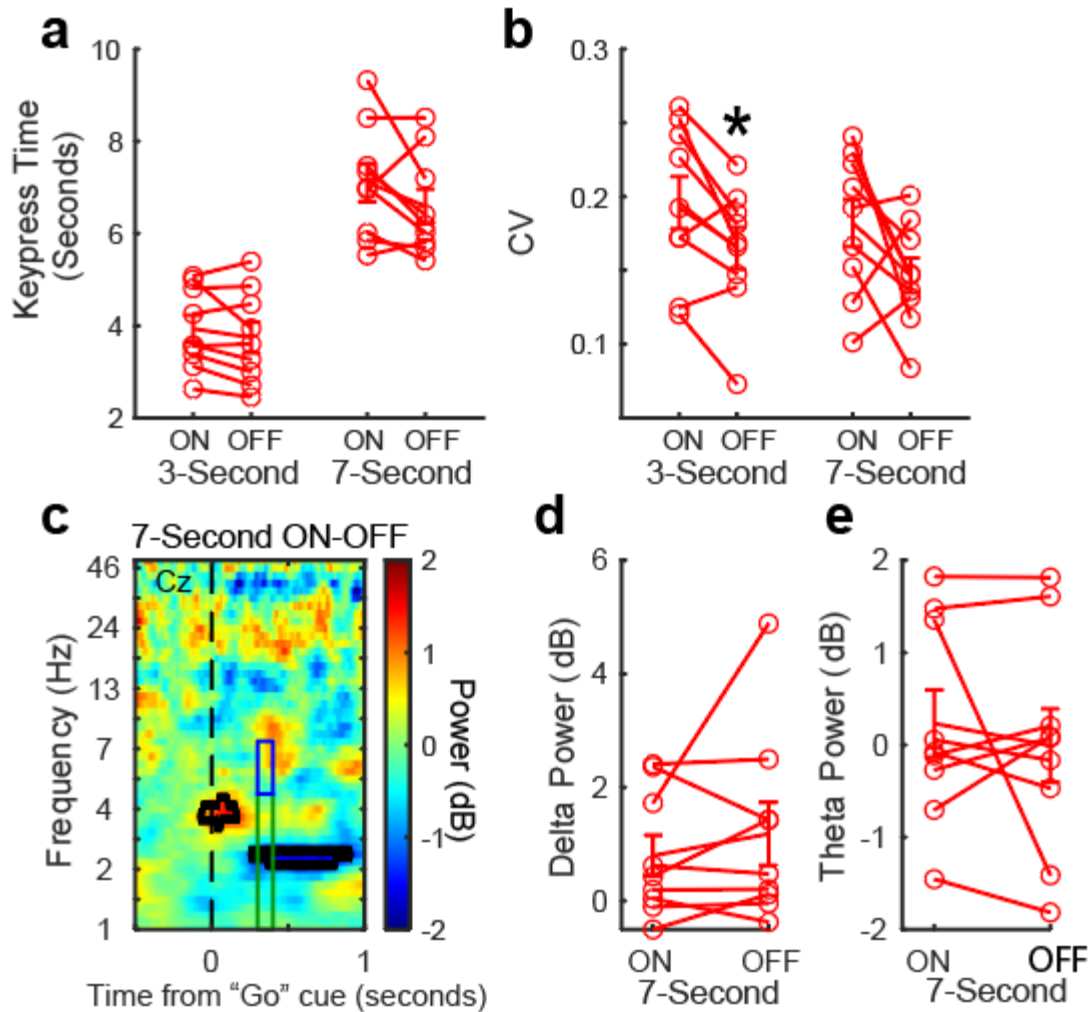

113

114 **Supplementary Figure 13. Levodopa does not reliably affect midfrontal delta-theta**

115 **activity.** In PD patients, we examined a) mean response time, b) keypress CV, c)

116 midfrontal cue-triggered activity from PD patients ON versus OFF levodopa. Areas

117 outlined by solid black lines indicate  $p < 0.05$  via a t-test of activity in control compared to

118 PD participants. d) Midfrontal cue-triggered delta activity (tf-ROI: green box) in c) and e)

119 midfrontal cue-triggered theta-activity (tf-ROI: blue box in c) from PD patients ON and

120 OFF levodopa. Data from 9 patients;  $* = p < 0.05$  via paired t-test.
